# Supplementary material for: Identification of circulating hub long noncoding RNAs associated with hypertrophic cardiomyopathy using weighted correlation network analysis
Source: PubMed Central journal article supplement — Mol Med Rep. 2020 Oct 6;22(6):4637–44. doi: 10.3892/mmr.2020.11566 (PMC7646839; doi:10.3892/mmr.2020.11566), 2020-10-06
Supplement: Supplementary_Data.pdf [file Supplementary_Data.pdf]

Figure S1. Analysis of network topology for various soft-thresholding powers. Numbers in the plots indicate the corresponding soft thresholding powers. A soft threshold power of 7 was selected for further analysis.

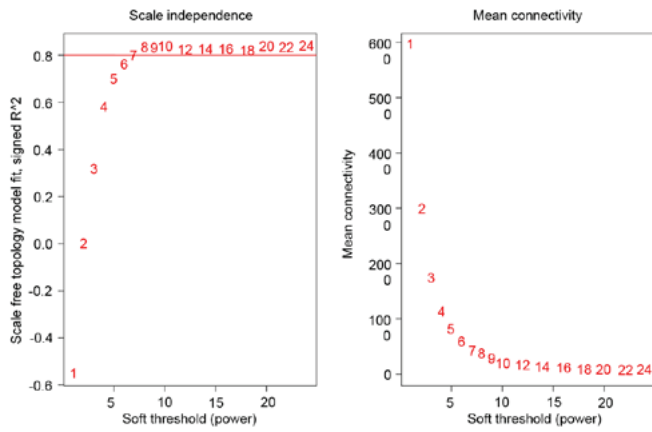

Figure S2. Clustering dendrograms of lncRNAs. Each colored row represents a corresponding module that contains a group of highly connected genes. As a result of weighted correlation network analysis, 27 co-expression modules were constructed, each containing 35-5,360 lncRNAs.

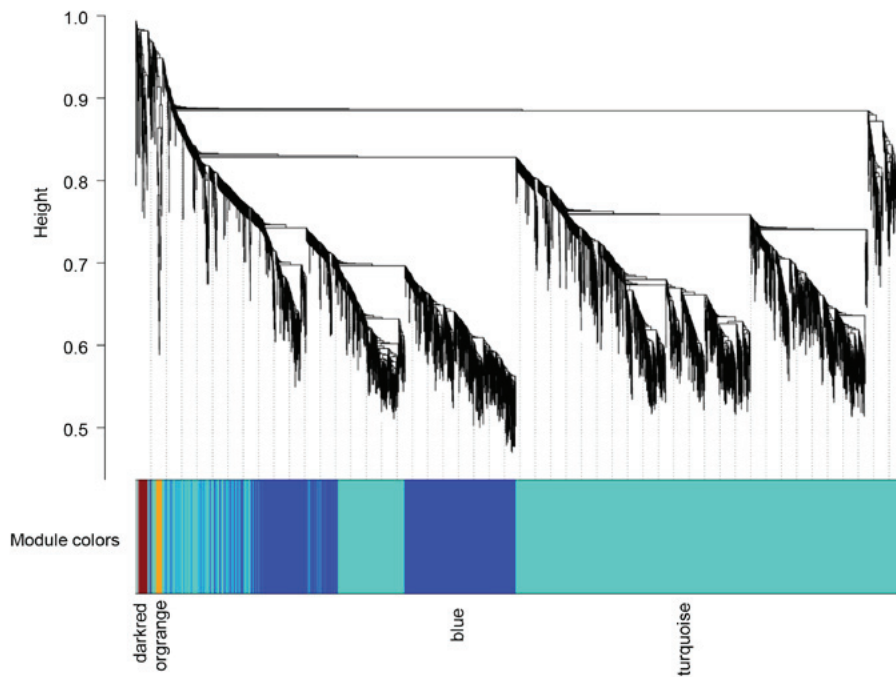

Figure S3. Scatterplots of MM vs. GS for clinical traits in the magenta module. Scatterplots of MM in the magenta module vs. GS for (A) HCM, (B) thickness, (C) obstruction, and (D) LA. GS, gene significance; MM, module membership; HCM, hypertrophic cardiomyopathy; LA, left atrial diameter.

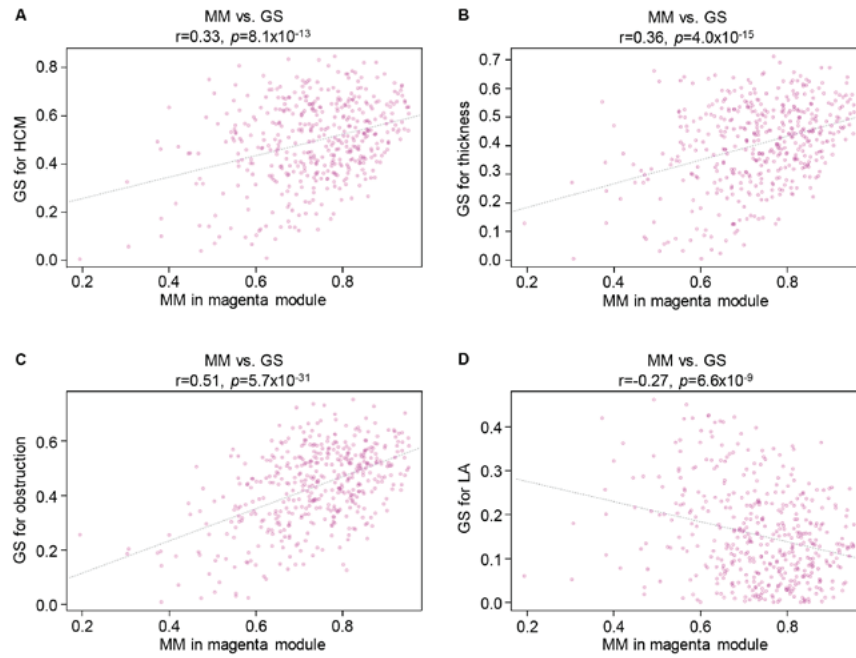

Figure S4. Scatterplots of MM vs. GS for clinical traits in the light-yellow module. Scatterplots of MM in the magenta module vs. GS for (A) HCM, (B) thickness, (C) obstruction and (D) LA. GS, gene significance; MM, module membership; HCM, hypertrophic cardiomyopathy; LA, left atrial diameter.

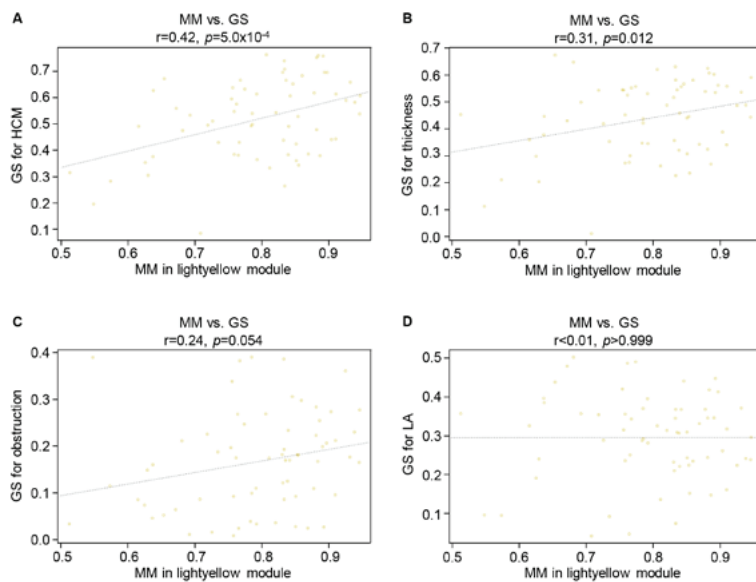

Figure S5. Functional annotation of lncRNAs in the magenta module. (A) GO terms for the host genes of lncRNAs in the magenta module. (B) Cardiac function-associated GO terms for the host genes of lncRNAs in the magenta module. P-values were adjusted using the Benjamini-Hochberg method. GO, Gene Ontology, lncRNA, long noncoding RNA.

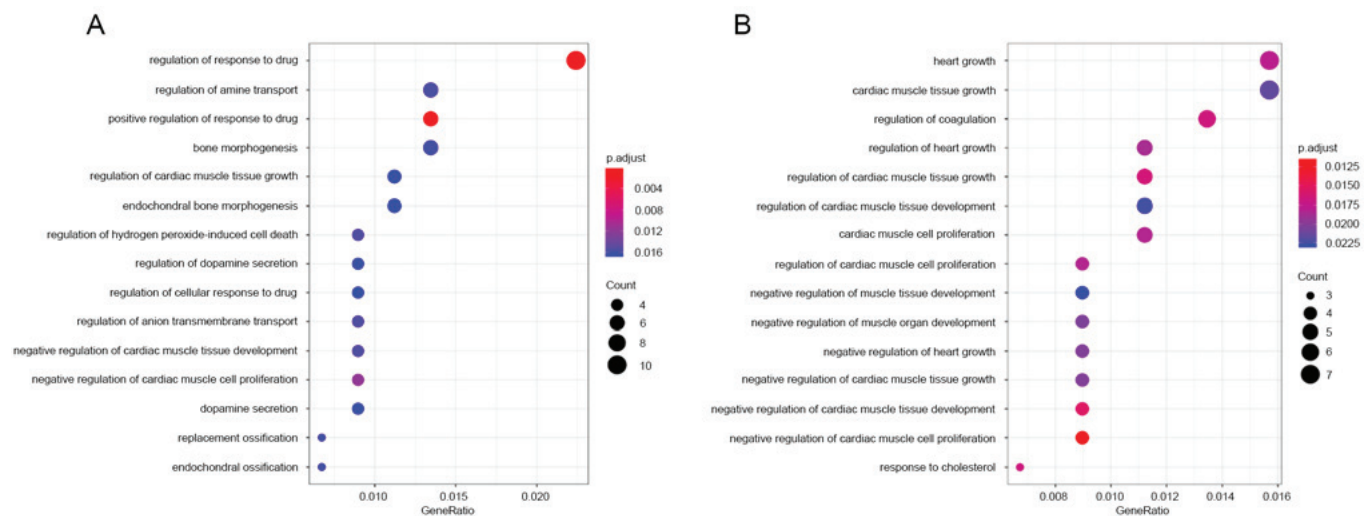

Table SI. Clinical characteristics of patients with HCM and controls.

| Characteristic                              | HCM (n=14)   | Control (n=7) | P-value |
|---------------------------------------------|--------------|---------------|---------|
| Subjects, n                                 | 14           | 7             |         |
| Age, years                                  | 60.92±10.27  | 54.71±7.49    | 0.173   |
| Males, n (%)                                | 7 (50.00)    | 3 (42.85)     | 0.757   |
| BMI, kg/m <sup>2</sup>                      | 23.68±2.72   | 22.36±1.39    | 0.249   |
| Smoking, n (%)                              | 4 (28.57)    | 0             | 0.255   |
| Total cholesterol, mmol/l                   | 4.28±0.68    | 6.03±1.21     | <0.001  |
| Triglyceride, mmol/l                        | 1.43±0.96    | 1.08±0.50     | 0.381   |
| White blood cell count, x10 <sup>9</sup> /l | 7.44±1.20    | 6.24±0.91     | 0.031   |
| Blood glucose, mmol/l                       | 4.67±0.67    | 5.40±0.61     | 0.028   |
| Hemoglobin, g/l                             | 137.35±16.49 | 143.57±11.08  | 0.382   |
| Creatinine, μmol/l                          | 84.00±14.14  | 72.85±16.74   | 0.125   |
| Systolic blood pressure, mmHg               | 123.28±9.31  | 73.07±12.14   | 0.126   |
| Diastolic blood pressure, mmHg              | 116.57±8.46  | 78.57±9.14    | 0.306   |
| Maximum LVWT, mm                            | 20.00±4.52   | 9.28±1.25     | <0.001  |
| LVOTO, n (%)                                | 6 (42.85)    | 0             | 0.061   |
| LA, mm                                      | 38.92±6.25   | 31.71±2.36    | 0.009   |
| IVSd, mm                                    | 17.00±5.87   | 9.28±1.25     | <0.001  |
| LVEF, %                                     | 68.28±8.99   | 67.71±6.92    | 0.161   |
| RVDd, mm                                    | 19.78±2.66   | 19.57±1.98    | 0.853   |
| LVDd, mm                                    | 45.21±7.09   | 45.42±4.27    | 0.943   |
| ICD, n (%)                                  | 4 (28.57)    | 0             | 0.255   |

Categorical variables are presented as n (%). Continuous variables are presented as the mean ± SD. HCM, hypertrophic cardiomyopathy; BMI, body mass index; LVWT, left ventricular wall thickness; LVOTO, left ventricular outflow tract obstruction; LA, left atrial diameter; IVSd, interventricular septal end diastole; LVEF, left ventricular ejection fraction; RVDd, right ventricular diastolic diameter; LVDd, left ventricular diastolic diameter; ICD, implantable cardioverter-defibrillator.

Table SII. Hub lncRNAs in magenta modules.

| Probe name                | $\log_2$ (FC) | P-value               | Adjusted P-value | Target ID         | Gene symbol    |
|---------------------------|---------------|-----------------------|------------------|-------------------|----------------|
| CUST_8471_PI437845250111  | 1.84          | $1.28 \times 10^{-6}$ | 0.004            | ENST00000591225   | RP11-132M7.3   |
| A_22_P00022498            | 1.16          | $2.91 \times 10^{-6}$ | 0.005            | lnc-NAA16-2:1     | lnc-NAA16-2    |
| CUST_1405_PI437859739     | 1.49          | $1.32 \times 10^{-5}$ | 0.013            | lnc-PDZRN4-4:4    | lnc-PDZRN4-4   |
| A_21_P0012026             | 1.40          | $1.48 \times 10^{-5}$ | 0.013            | ENST00000432608   | TEX41          |
| CUST_2854_PI437845250111  | 1.68          | $2.04 \times 10^{-5}$ | 0.013            | ENST00000439440   | RP11-452F19.3  |
| CUST_2044_PI437845250111  | 1.81          | $2.08 \times 10^{-5}$ | 0.013            | ENST00000585330   | LAMTOR5-AS1    |
| CUST_2820_PI437845420     | 1.10          | $1.44 \times 10^{-5}$ | 0.013            | lnc-TLR2-3:1      | lnc-TLR2-3     |
| A_21_P0001153             | 0.93          | $3.27 \times 10^{-5}$ | 0.014            | NR_034089         | LOC100131564   |
| CUST_5685_PI437845250111  | 1.18          | $3.23 \times 10^{-5}$ | 0.014            | ENST00000488040   | RP11-550I24.2  |
| A_22_P00006790            | 0.88          | $3.21 \times 10^{-5}$ | 0.014            | lnc-FZD4-1:1      | lnc-FZD4-1     |
| A_22_P00008862            | 1.14          | $7.11 \times 10^{-5}$ | 0.018            | NR_038878         | LINC00550      |
| CUST_3927_PI437845250111  | 0.95          | $7.92 \times 10^{-5}$ | 0.019            | ENST00000433433   | LINC01159      |
| CUST_460_PI438111429      | 1.37          | $1.04 \times 10^{-4}$ | 0.021            | ENST00000429664   | LINC01122      |
| A_21_P0012197             | 0.98          | $1.38 \times 10^{-4}$ | 0.024            | TCONS_12_00017189 | XLOC_12_009182 |
| CUST_20907_PI437845250111 | 0.81          | $1.74 \times 10^{-4}$ | 0.027            | ENST00000425602   | LINC00894      |
| CUST_3503_PI438111429     | 1.09          | $2.09 \times 10^{-4}$ | 0.028            | NR_037632         | MYCBP          |
| CUST_18427_PI437845250111 | 0.87          | $2.09 \times 10^{-4}$ | 0.028            | ENST00000588047   | CTD-2006C1.2   |
| A_22_P00021401            | 0.87          | $2.24 \times 10^{-4}$ | 0.030            | ENST00000553990   | NA             |
| CUST_2135_PI438111429     | 0.77          | $3.32 \times 10^{-4}$ | 0.035            | ENST00000508688   | HOXB-AS1       |
| CUST_1276_PI437845250111  | 1.10          | $3.53 \times 10^{-4}$ | 0.036            | ENST00000607013   | RP11-345P4.10  |
| A_33_P3274754             | 0.85          | $3.77 \times 10^{-4}$ | 0.037            | NR_027455         | LINC00893      |
| CUST_1322_PI437845250111  | 0.95          | $3.97 \times 10^{-4}$ | 0.037            | ENST00000587071   | TP73-AS1       |
| A_21_P0004523             | 0.99          | $4.16 \times 10^{-4}$ | 0.037            | lnc-C5orf30-2:1   | lnc-C5orf30-2  |
| A_21_P0003982             | 1.17          | $5.85 \times 10^{-4}$ | 0.041            | NR_033832         | LOC340113      |
| CUST_13359_PI437845420    | 0.95          | $7.06 \times 10^{-4}$ | 0.045            | lnc-MSX1-5:1      | lnc-MSX1-5     |
| A_33_P3410232             | 0.63          | $7.20 \times 10^{-4}$ | 0.045            | NR_024541         | LY6G6E         |
| A_21_P0007594             | 1.26          | $6.88 \times 10^{-4}$ | 0.045            | lnc-SYT1-2:1      | lnc-SYT1-2     |
| CUST_4619_PI437859739     | 1.09          | $9.53 \times 10^{-4}$ | 0.051            | lnc-CLN6-3:2      | lnc-CLN6-3     |
| CUST_6810_PI437845250111  | 0.86          | $1.05 \times 10^{-3}$ | 0.053            | ENST00000610019   | RP11-219C20.3  |
| CUST_4030_PI437944915     | 0.95          | $1.08 \times 10^{-3}$ | 0.053            | lnc-ZNF672-2:3    | lnc-ZNF672-2   |
| A_21_P0012522             | 0.71          | $1.13 \times 10^{-3}$ | 0.054            | NR_037891         | LOC100507391   |
| A_21_P0007917             | 0.61          | $1.24 \times 10^{-3}$ | 0.057            | lnc-GPR183-2:3    | lnc-GPR183-2   |
| CUST_16451_PI437845250111 | 0.73          | $1.30 \times 10^{-3}$ | 0.057            | ENST00000566506   | RP11-252A24.5  |
| CUST_5408_PI437845250111  | 0.77          | $1.47 \times 10^{-3}$ | 0.061            | ENST00000609673   | RP11-484K9.4   |
| A_21_P0002906             | 0.58          | $1.48 \times 10^{-3}$ | 0.061            | NR_046852         | TMEM212-AS1    |
| A_33_P3663277             | 0.61          | $1.50 \times 10^{-3}$ | 0.061            | NR_038918         | LOC339666      |
| CUST_1328_PI437947525111  | 0.55          | $1.51 \times 10^{-3}$ | 0.061            | TCONS_00019217    | linc-EIF3F-1   |
| CUST_16739_PI437845250111 | 0.72          | $1.65 \times 10^{-3}$ | 0.063            | ENST00000570712   | AC012146.7     |
| A_21_P0011489             | 0.55          | $1.94 \times 10^{-3}$ | 0.069            | TCONS_12_00010286 | XLOC_12_005553 |
| A_22_P00004878            | 0.62          | $2.02 \times 10^{-3}$ | 0.070            | ENST00000567540   | NA             |
| A_21_P0007733             | 0.74          | $2.12 \times 10^{-3}$ | 0.072            | lnc-C12orf50-2:1  | lnc-C12orf50-2 |
| A_21_P0013163             | 0.82          | $2.16 \times 10^{-3}$ | 0.072            | NR_024045         | RAET1K         |
| A_33_P3324186             | 0.63          | $2.24 \times 10^{-3}$ | 0.073            | NR_046243         | LOC642366      |
| A_22_P00012241            | 0.90          | $2.59 \times 10^{-3}$ | 0.078            | lnc-PPIL2-1:1     | lnc-PPIL2-1    |
| CUST_7611_PI437859739     | 0.50          | $2.61 \times 10^{-3}$ | 0.079            | lnc-ASPDH-1:1     | lnc-ASPDH-1    |
| CUST_8803_PI437859739     | 0.70          | $2.79 \times 10^{-3}$ | 0.082            | lnc-MGAT4A-1:3    | lnc-MGAT4A-1   |
| CUST_2232_PI437947525     | 0.46          | $2.81 \times 10^{-3}$ | 0.082            | TCONS_12_00008486 | linc-APBA2-3   |
| A_23_P408930              | 0.45          | $3.20 \times 10^{-3}$ | 0.088            | NR_027688         | OR7E5P         |
| A_21_P0001645             | 0.62          | $3.28 \times 10^{-3}$ | 0.090            | lnc-TOMM20-2:7    | lnc-TOMM20-2   |
| CUST_16738_PI437845250111 | 0.61          | $3.28 \times 10^{-3}$ | 0.090            | ENST00000413077   | AC012146.7     |
| CUST_14253_PI437845250111 | 0.75          | $3.54 \times 10^{-3}$ | 0.093            | ENST00000570285   | RP11-29G8.3    |
| CUST_8771_PI437845250111  | 0.77          | $3.62 \times 10^{-3}$ | 0.094            | ENST00000603042   | RP3-466P17.2   |
| CUST_12515_PI437845250111 | 0.41          | $4.15 \times 10^{-3}$ | 0.101            | ENST00000533218   | RP11-618K13.2  |
| A_22_P00023600            | 0.90          | $4.17 \times 10^{-3}$ | 0.101            | ENST00000563289   | NA             |
| CUST_6013_PI437859739     | 0.58          | $4.67 \times 10^{-3}$ | 0.108            | lnc-USP36-2:1     | lnc-USP36-2    |
| A_22_P00019529            | 0.36          | $5.29 \times 10^{-3}$ | 0.112            | NR_125874         | LOC102724096   |

Table SII. Continued.

| Probe name                | log <sub>2</sub> (FC) | P-value               | Adjusted P-value | Target ID         | Gene symbol     |
|---------------------------|-----------------------|-----------------------|------------------|-------------------|-----------------|
| CUST_17640_PI437845250111 | 0.53                  | 5.34x10 <sup>-3</sup> | 0.112            | ENST00000588701   | RP11-936I5.1    |
| A_22_P00021795            | 0.60                  | 5.55x10 <sup>-3</sup> | 0.115            | NR_046600         | MTOR-AS1        |
| CUST_16109_PI437845250111 | 0.71                  | 6.14x10 <sup>-3</sup> | 0.120            | ENST00000609586   | AC009158.1      |
| CUST_12586_PI437845250111 | 0.47                  | 7.58x10 <sup>-3</sup> | 0.130            | ENST00000535076   | SNHG1           |
| A_32_P56249               | 0.52                  | 8.13x10 <sup>-3</sup> | 0.134            | NR_038996         | USP30-AS1       |
| CUST_10245_PI437845420    | 0.46                  | 8.38x10 <sup>-3</sup> | 0.136            | lnc-ARHGAP4-1:1   | lnc-ARHGAP4-1   |
| A_21_P0005793             | 0.67                  | 9.14x10 <sup>-3</sup> | 0.143            | lnc-ANGPT2-2:4    | lnc-ANGPT2-2    |
| A_24_P92451               | 0.60                  | 9.26x10 <sup>-3</sup> | 0.143            | NR_108107         | FAM230B         |
| A_22_P00012686            | 0.51                  | 9.50x10 <sup>-3</sup> | 0.145            | ENST00000584807   | ESP33           |
| CUST_10341_PI437845250111 | 0.57                  | 9.99x10 <sup>-3</sup> | 0.148            | ENST00000519233   | RP11-68L18.1    |
| A_22_P00005903            | 0.57                  | 1.04x10 <sup>-2</sup> | 0.150            | ENST00000434589   | NA              |
| CUST_7164_PI437859739     | 0.42                  | 1.48x10 <sup>-2</sup> | 0.176            | lnc-ZNF98-6:1     | lnc-ZNF98-6     |
| CUST_2094_PI437859739     | 0.54                  | 1.53x10 <sup>-2</sup> | 0.178            | lnc-GLT8D2-1:1    | lnc-GLT8D2-1    |
| CUST_22545_PI437845250    | 0.44                  | 1.62x10 <sup>-2</sup> | 0.182            | TCONS_12_00022946 | linc-GTF2H2-1   |
| CUST_13143_PI437845420    | 0.44                  | 1.93x10 <sup>-2</sup> | 0.196            | lnc-KLK4-2:1      | lnc-KLK4-2      |
| A_21_P0006231             | 0.47                  | 2.86x10 <sup>-2</sup> | 0.236            | lnc-METTLL11A-5:1 | lnc-METTLL11A-5 |
| CUST_8244_PI437845250111  | 0.45                  | 3.08x10 <sup>-2</sup> | 0.243            | ENST00000477984   | LINC00336       |

A total of 73 hub lncRNAs were identified in the magenta module. Twenty-seven hub lncRNAs were significantly dysregulated. FC, fold-change; NA, not available; lncRNA, long noncoding RNA.



Table SIII. Hub lncRNAs in the light-yellow module.

| Probe name                | log <sub>2</sub> (FC) | P-value                | Adjusted P-value | Target ID            | Gene symbol        |
|---------------------------|-----------------------|------------------------|------------------|----------------------|--------------------|
| A_22_P00006790            | 0.88                  | 3.21x10 <sup>-5</sup>  | 0.014            | lnc-FZD4-1:1         | lnc-FZD4-1         |
| CUST_19393_PI437845250111 | 1.04                  | 4.05x10 <sup>-5</sup>  | 0.015            | ENST00000415411      | FAM182A            |
| A_22_P00014379            | 0.94                  | 4.01x10 <sup>-5</sup>  | 0.015            | lnc-SEZ6-1:1         | lnc-SEZ6-1         |
| CUST_9766_PI437845420     | 1.30                  | 5.51x10 <sup>-5</sup>  | 0.016            | lnc-ZC3H12B-14:1     | lnc-ZC3H12B-14     |
| CUST_7120_PI437845250111  | 1.02                  | 5.42x10 <sup>-5</sup>  | 0.016            | ENST00000505518      | CTD-2218G20.2      |
| A_21_P0007236             | 0.80                  | 7.12 x10 <sup>-5</sup> | 0.018            | lnc-P2RY6-1:1        | lnc-P2RY6-1        |
| CUST_4226_PI437845250111  | 0.79                  | 8.56x10 <sup>-5</sup>  | 0.020            | ENST00000608652      | TEX41              |
| A_21_P0000675             | 1.21                  | 1.58x10 <sup>-4</sup>  | 0.025            | NR_037168            | LOC100287846       |
| A_22_P00006715            | 1.15                  | 2.37x10 <sup>-4</sup>  | 0.030            | ENST00000465347      | NA                 |
| CUST_9360_PI437859739     | 0.92                  | 2.97x10 <sup>-4</sup>  | 0.033            | lnc-UBR3-1:3         | lnc-UBR3-1         |
| A_22_P00012462            | 0.93                  | 3.07x10 <sup>-4</sup>  | 0.034            | lnc-PRR15-1:1        | lnc-PRR15-1        |
| CUST_96_PI438111429       | 0.81                  | 3.86x10 <sup>-4</sup>  | 0.037            | ENST00000333854      | RP11-181G12.2      |
| A_21_P0004719             | 0.99                  | 6.91x10 <sup>-4</sup>  | 0.045            | ENST00000443445      | NA                 |
| A_21_P0007689             | 0.58                  | 1.07x10 <sup>-3</sup>  | 0.053            | lnc-HIST4H4-3:1      | lnc-HIST4H4-3      |
| CUST_4030_PI437944915     | 0.95                  | 1.08x10 <sup>-3</sup>  | 0.053            | lnc-ZNF672-2:3       | lnc-ZNF672-2       |
| A_33_P3353991             | 0.66                  | 1.10x10 <sup>-3</sup>  | 0.054            | lnc-OR10AB1P-1:1     | lnc-OR10AB1P-1     |
| CUST_16451_PI437845250111 | 0.73                  | 1.30x10 <sup>-3</sup>  | 0.057            | ENST00000566506      | RP11-252A24.5      |
| A_21_P0002906             | 0.58                  | 1.48x10 <sup>-3</sup>  | 0.061            | NR_046852            | TMEM212-AS1        |
| CUST_1328_PI437947525111  | 0.55                  | 1.51x10 <sup>-3</sup>  | 0.061            | TCONS_00019217       | linc-EIF3F-1       |
| CUST_2588_PI437845250111  | 0.64                  | 1.72x10 <sup>-3</sup>  | 0.064            | ENST00000457217      | RP11-222A5.1       |
| CUST_9091_PI437859739     | 0.68                  | 1.94x10 <sup>-3</sup>  | 0.069            | lnc-C2orf27A-4:1     | lnc-C2orf27A-4     |
| A_33_P3324186             | 0.63                  | 2.24x10 <sup>-3</sup>  | 0.073            | NR_046243            | LOC642366          |
| CUST_5385_PI437845420     | 0.74                  | 2.29x10 <sup>-3</sup>  | 0.074            | lnc-PGM3-3:1         | lnc-PGM3-3         |
| A_22_P00004478            | 0.66                  | 2.37x10 <sup>-3</sup>  | 0.075            | NR_038930            | LOC100507250       |
| A_21_P0005609             | 0.71                  | 2.76x10 <sup>-3</sup>  | 0.081            | NR_024586            | KMT2E-AS1          |
| CUST_13248_PI437845250111 | 0.73                  | 2.82x10 <sup>-3</sup>  | 0.082            | ENST00000456299      | RP11-444D3.1       |
| CUST_5377_PI437845420     | 0.64                  | 2.99x10 <sup>-3</sup>  | 0.086            | lnc-FAM46A-4:2       | lnc-FAM46A-4       |
| A_21_P0008052             | 0.57                  | 3.52x10 <sup>-3</sup>  | 0.093            | lnc-NHLRC3-1:1       | lnc-NHLRC3-1       |
| CUST_8771_PI437845250111  | 0.77                  | 3.62x10 <sup>-3</sup>  | 0.094            | ENST00000603042      | RP3-466P17.2       |
| A_21_P0010995             | 0.69                  | 4.59x10 <sup>-3</sup>  | 0.106            | TCONS_12_00004725    | XLOC_12_002441     |
| A_22_P00023423            | 0.52                  | 5.19x10 <sup>-3</sup>  | 0.112            | lnc-AP000892.4.1-1:1 | lnc-AP000892.4.1-1 |
| CUST_12586_PI437845250111 | 0.47                  | 7.58x10 <sup>-3</sup>  | 0.130            | ENST00000535076      | SNHG1              |
| CUST_10245_PI437845420    | 0.46                  | 8.38x10 <sup>-3</sup>  | 0.136            | lnc-ARHGAP4-1:1      | lnc-ARHGAP4-1      |
| CUST_162_PI437859739      | 0.33                  | 8.67x10 <sup>-3</sup>  | 0.138            | lnc-CD248-1:1        | lnc-CD248-1        |
| CUST_4950_PI437845250111  | 0.39                  | 8.66x10 <sup>-3</sup>  | 0.138            | ENST00000430219      | GRIP2              |
| A_21_P0010070             | 0.75                  | 1.01x10 <sup>-2</sup>  | 0.148            | lnc-TCFL5-3:2        | lnc-TCFL5-3        |
| CUST_7164_PI437859739     | 0.42                  | 1.48x10 <sup>-2</sup>  | 0.176            | lnc-ZNF98-6:1        | lnc-ZNF98-6        |
| CUST_22545_PI437845250    | 0.44                  | 1.62x10 <sup>-2</sup>  | 0.182            | TCONS_12_00022946    | linc-GTF2H2-1      |
| CUST_3448_PI437944915     | 0.40                  | 1.73x10 <sup>-2</sup>  | 0.188            | lnc-ATP6V1G3-8:1     | lnc-ATP6V1G3-8     |
| CUST_13143_PI437845420    | 0.44                  | 1.93x10 <sup>-2</sup>  | 0.196            | lnc-KLK4-2:1         | lnc-KLK4-2         |
| A_21_P0006231             | 0.47                  | 2.86x10 <sup>-2</sup>  | 0.236            | lnc-METTL11A-5:1     | lnc-METTL11A-5     |
| CUST_8244_PI437845250111  | 0.45                  | 3.08x10 <sup>-2</sup>  | 0.243            | ENST00000477984      | LINC00336          |

A total of 42 hub lncRNAs were identified in the light-yellow module. Thirteen hub lncRNAs were significantly dysregulated. FC, fold-change; NA, not available; lncRNA, long noncoding RNA.

Table SIV. Functional annotation of three differentially expressed hub lncRNAs.

| LncRNA          | Gene symbol   | GO term                                                       | P-value               |
|-----------------|---------------|---------------------------------------------------------------|-----------------------|
| lnc-P2RY6-1:1   | lnc-P2RY6-1   | GO:0002292 T cell differentiation involved in immune response | 3.82x10 <sup>-4</sup> |
|                 |               | GO:0032352 positive regulation of hormone metabolic process   | 8.34x10 <sup>-4</sup> |
|                 |               | GO:0043950 positive regulation of cAMP-mediated signaling     | 3.21x10 <sup>-3</sup> |
|                 |               | GO:0010660 regulation of muscle cell apoptotic process        | 4.99x10 <sup>-3</sup> |
|                 |               | GO:0003208 cardiac ventricle morphogenesis                    | 6.29x10 <sup>-3</sup> |
| ENST00000488040 | RP11-550I24.2 | GO:0060419 heart growth                                       | 4.15x10 <sup>-4</sup> |
|                 |               | GO:0055017 cardiac muscle tissue growth                       | 2.95x10 <sup>-4</sup> |
|                 |               | GO:0010613 positive regulation of cardiac muscle hypertrophy  | 4.48x10 <sup>-3</sup> |
|                 |               | GO:0003301 physiological cardiac muscle hypertrophy           | 3.44x10 <sup>-3</sup> |
|                 |               | GO:0050432 catecholamine secretion                            | 1.51x10 <sup>-2</sup> |
| ENST00000588047 | CTD-2006C1.2  | GO:1901984 negative regulation of protein acetylation         | 5.60x10 <sup>-5</sup> |
|                 |               | GO:0001783 B cell apoptotic process                           | 2.09x10 <sup>-3</sup> |
|                 |               | GO:0050432 catecholamine secretion                            | 1.72x10 <sup>-3</sup> |
|                 |               | GO:0016242 negative regulation of macroautophagy              | 3.08x10 <sup>-3</sup> |
|                 |               | GO:2000406 positive regulation of T cell migration            | 3.08x10 <sup>-3</sup> |

For each differentially expressed hub lncRNA, five significant GO terms are presented (P<0.05). GO, Gene Ontology; cAMP, cyclic adenosine monophosphate; lncRNA, long noncoding RNA.
